# Supplementary material for: Molecular recognition of modified nucleobases. Self-complementarity and base-pairing of betainic guanine model compoundsElectronic supplementary information (ESI) available: electrospray ionization mass spectra. See http://www.rsc.org/suppdata/p1/b1/b110318k/
Source: Royal Society of Chemistry journal article supplement (doi:10.1039/b110318k), 2002-03-12

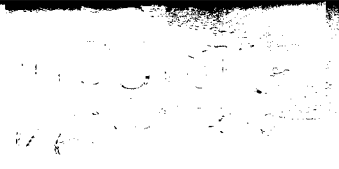

# **Molecular Recognition of Modified Nucleobases. Self-Complementarity and Base-Pairing of Betainic Guanine Model Compounds**

Andreas Schmidt\*<sup>a</sup>, Nikoloz Kobakhidze<sup>a</sup> and Markus Karl Kindermann<sup>b</sup>

<sup>a</sup> Technische Universität Clausthal, Institut für Organische Chemie, Leibnizstraße 6, D-38678 Clausthal-Zellerfeld, Germany; <sup>b</sup> Ernst-Moritz-Arndt-Universität Greifswald, Institut für Chemie und Biochemie, Soldmannstrasse 16, D-17487 Greifswald, Germany.

E-mail: [schmidt@ioc.tu-clausthal.de](mailto:schmidt@ioc.tu-clausthal.de)

Supplementary material

ESI mass spectra

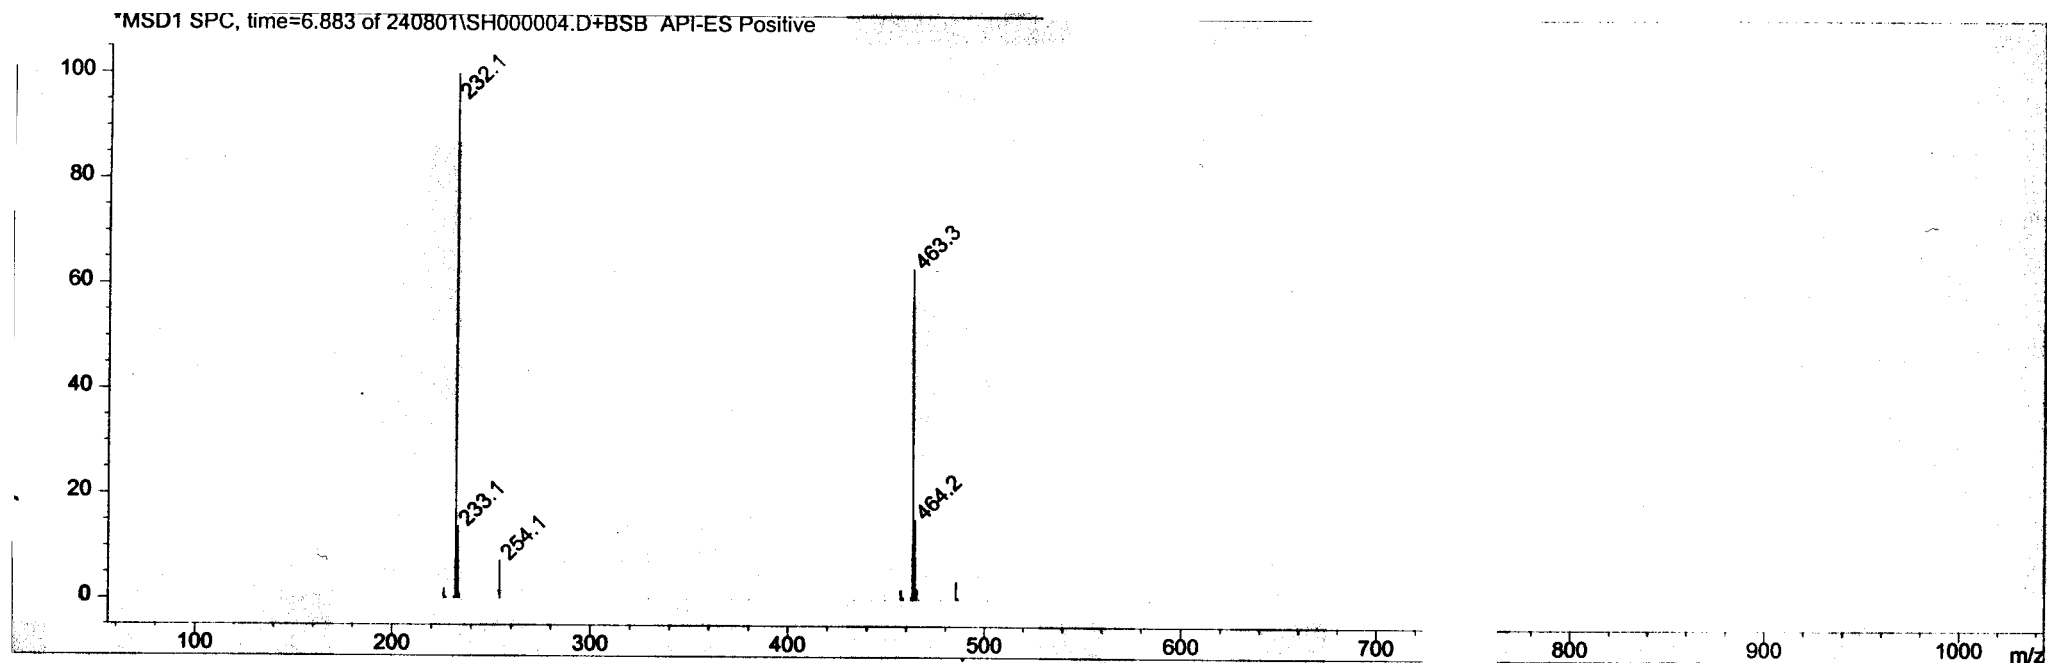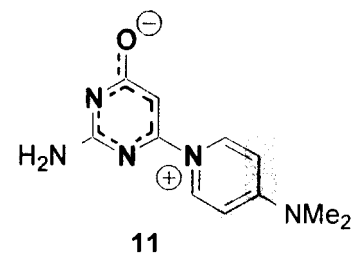

Injection date: 8 / 24 / 01  
Fragmentor voltage: 15 V  
Solvent flow : 0.8 mL/min.  
Solvent mixture: Water / MeCN = 1 : 9  
Positive detection mode  
Drying gas temp. 300°C  
Drying gas flow: 10 L/min  
Noise Cutoff: 5000 counts  
Reportable Ion Abundance: > 10%

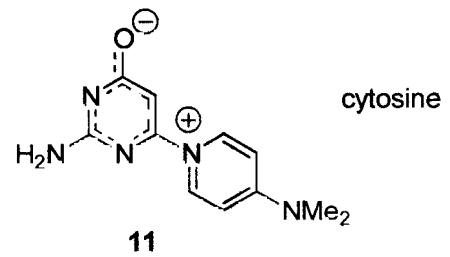

Injection date: 8 / 24 / 01  
Fragmentor voltage: 0, 0 V  
Solvent flow : 0.8 mL/min.  
Solvent mixture: Water / MeCN = 1 : 9  
Positive detection mode  
Drying gas temp. 140°C  
Drying gas flow: 10 L/min  
Noise Cutoff: 5000 counts  
Reportable Ion Abundance: > 10%

\*MSD1 SPC, time=2.155 of 240801\SH000008.D+BSB API-ES Positive

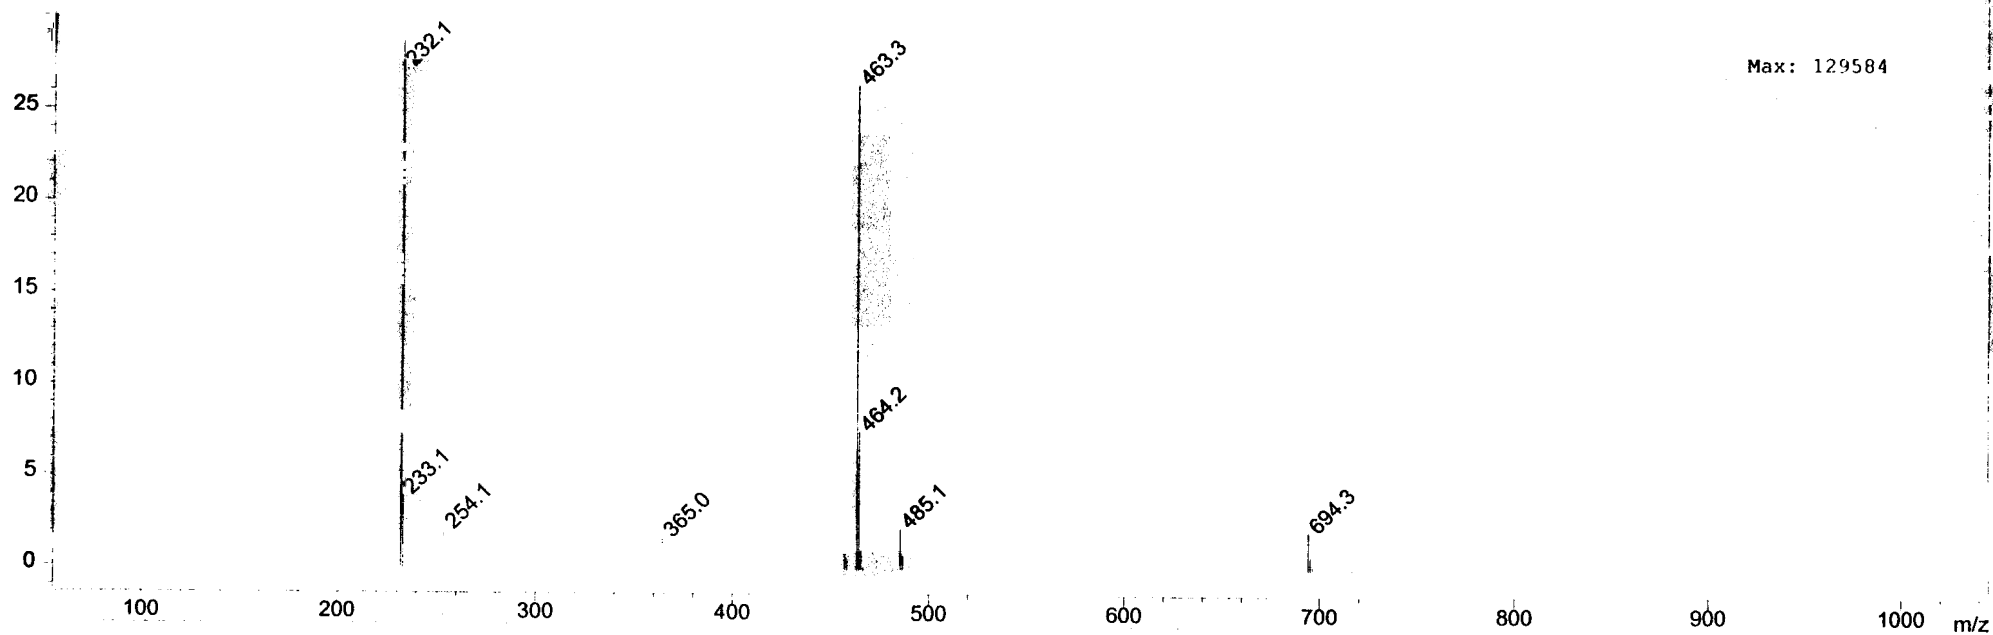

\*MSD1 SPC, time=4.479 of 240801\SH000008.D+BSB API-ES Positive

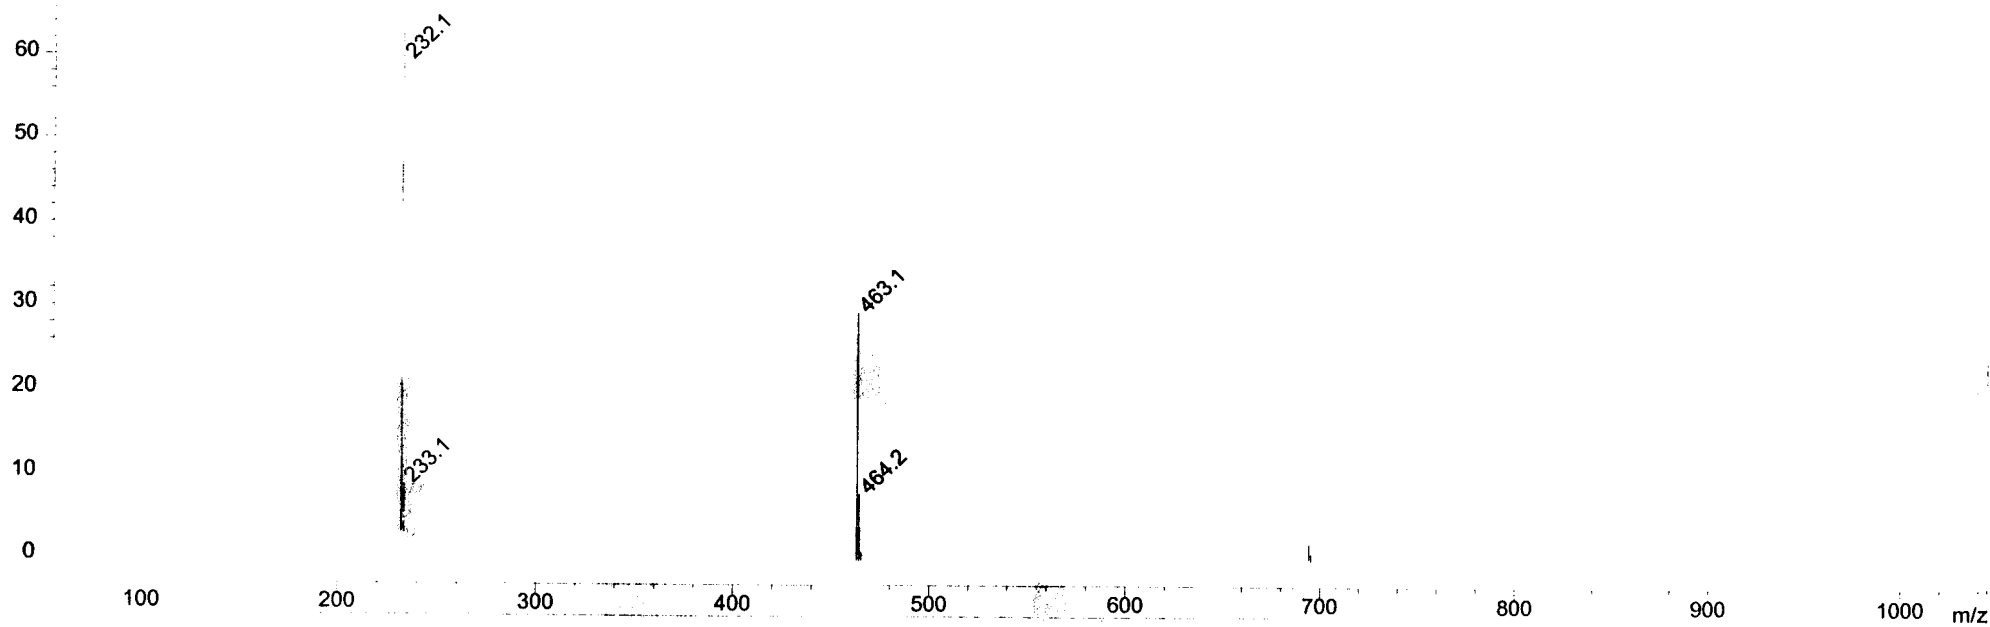

MS Spectrum

MSD1 SPC, time=2.182 of SNAPSHOT.D

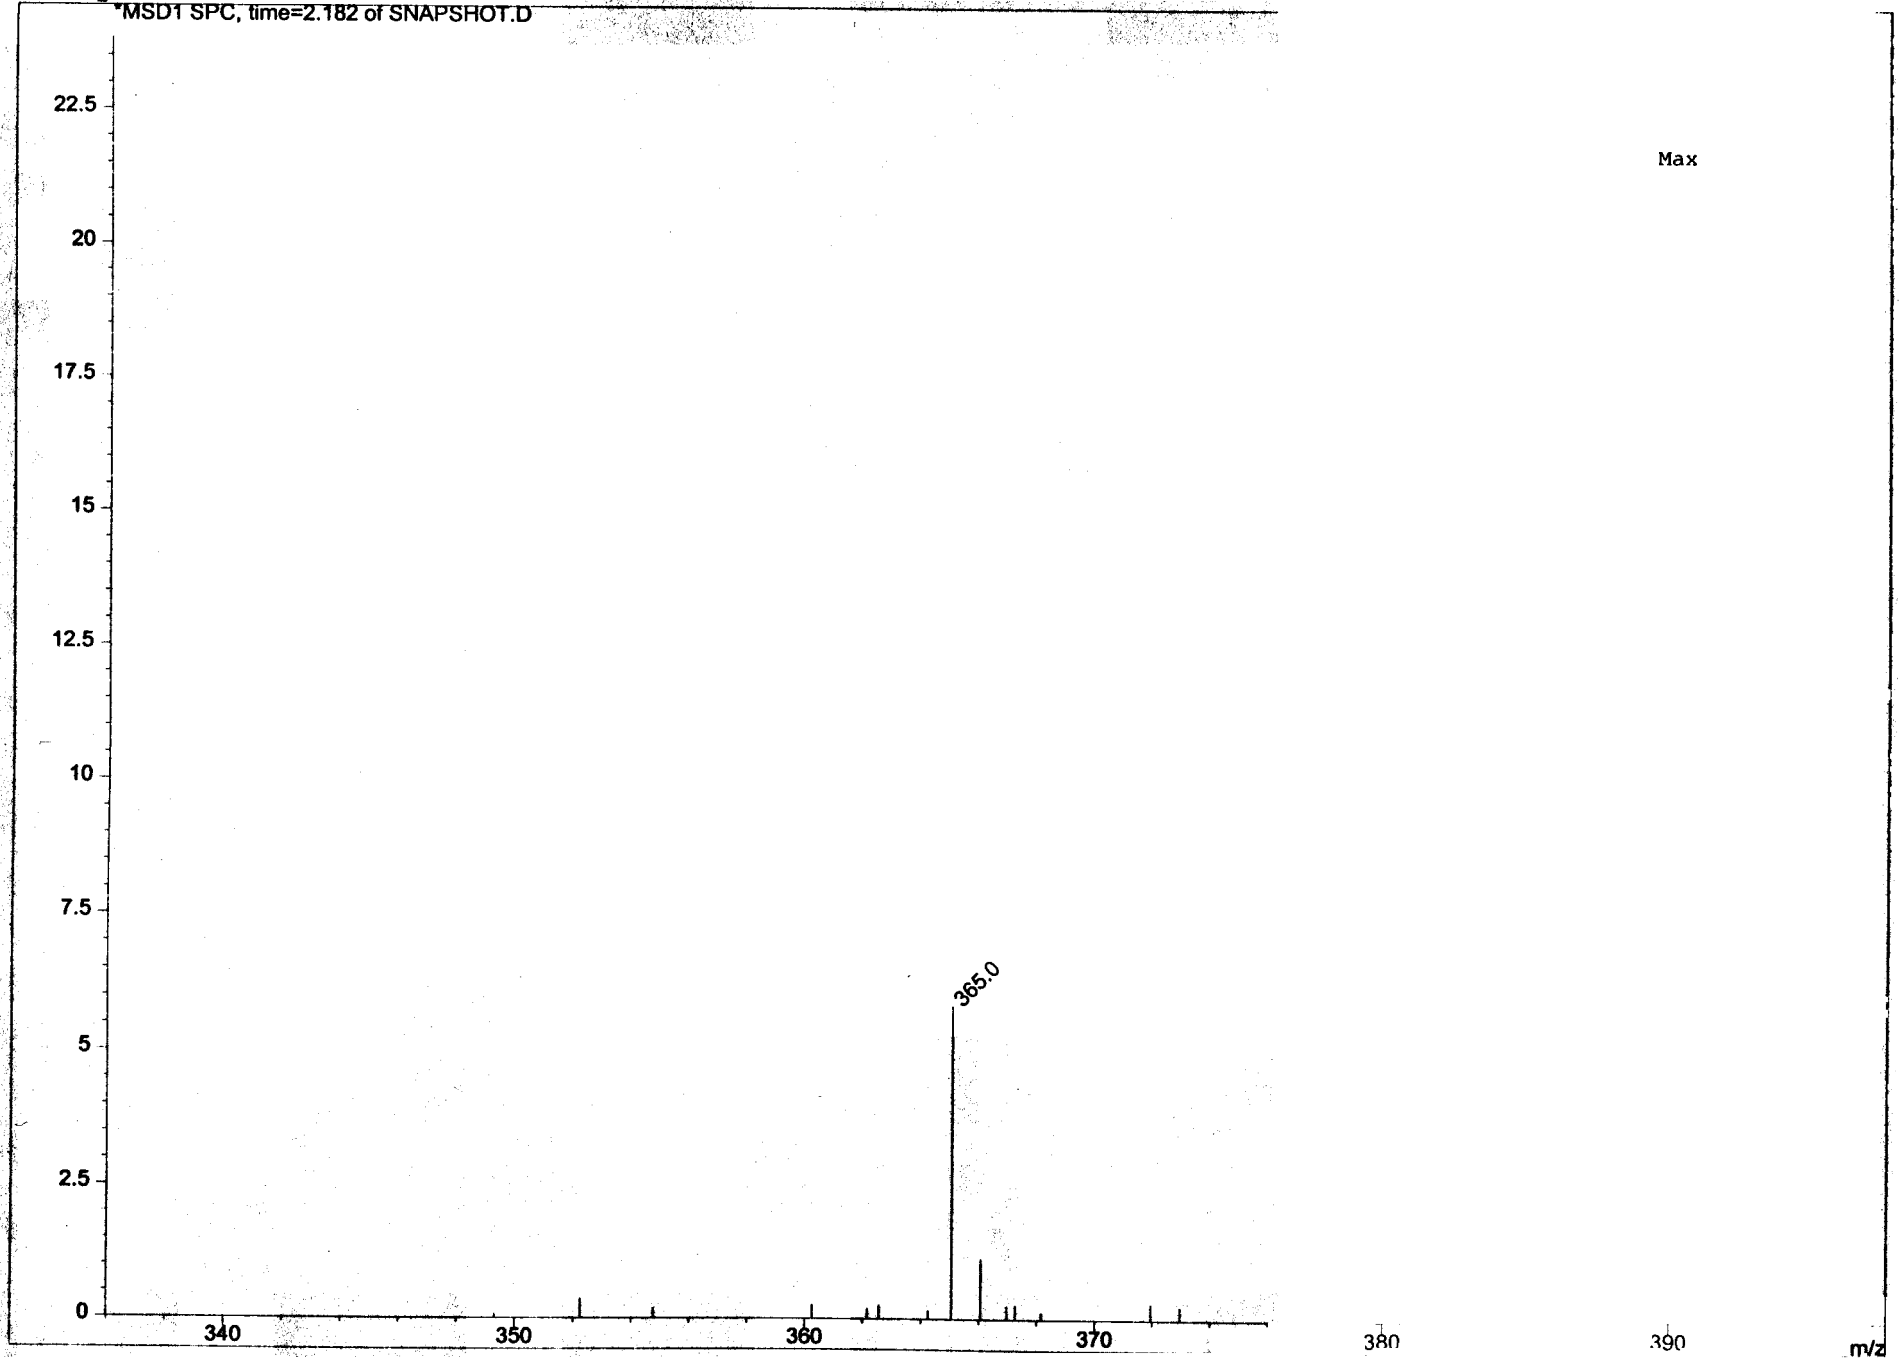

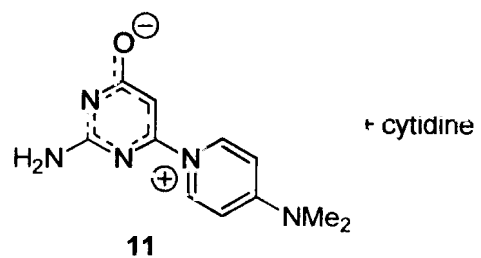

**Injection date: 8 / 24 / 01**  
**Fragmentor voltage: 0 V**  
**Solvent flow : 0.8 mL/min.**  
**Solvent mixture: Water / MeCN =**  
**Positive detection mode**  
**Drying gas temp. 140°C**  
**Drying gas flow: 10 L/min**  
**Noise Cutoff: 5000 counts**  
**Reportable Ion Abundance: > 10%**

| Retention Time (MS) | MS Area | Mol. Weight or Ion                           |
|---------------------|---------|----------------------------------------------|
| 2.179               | 2696495 | 475.15 I<br>344.15 I<br>343.15 I<br>232.15 I |
| 2.441               | 3356708 | 344.15 I<br>343.15 I                         |
| 3.126               | 1813394 | 343.15 I                                     |

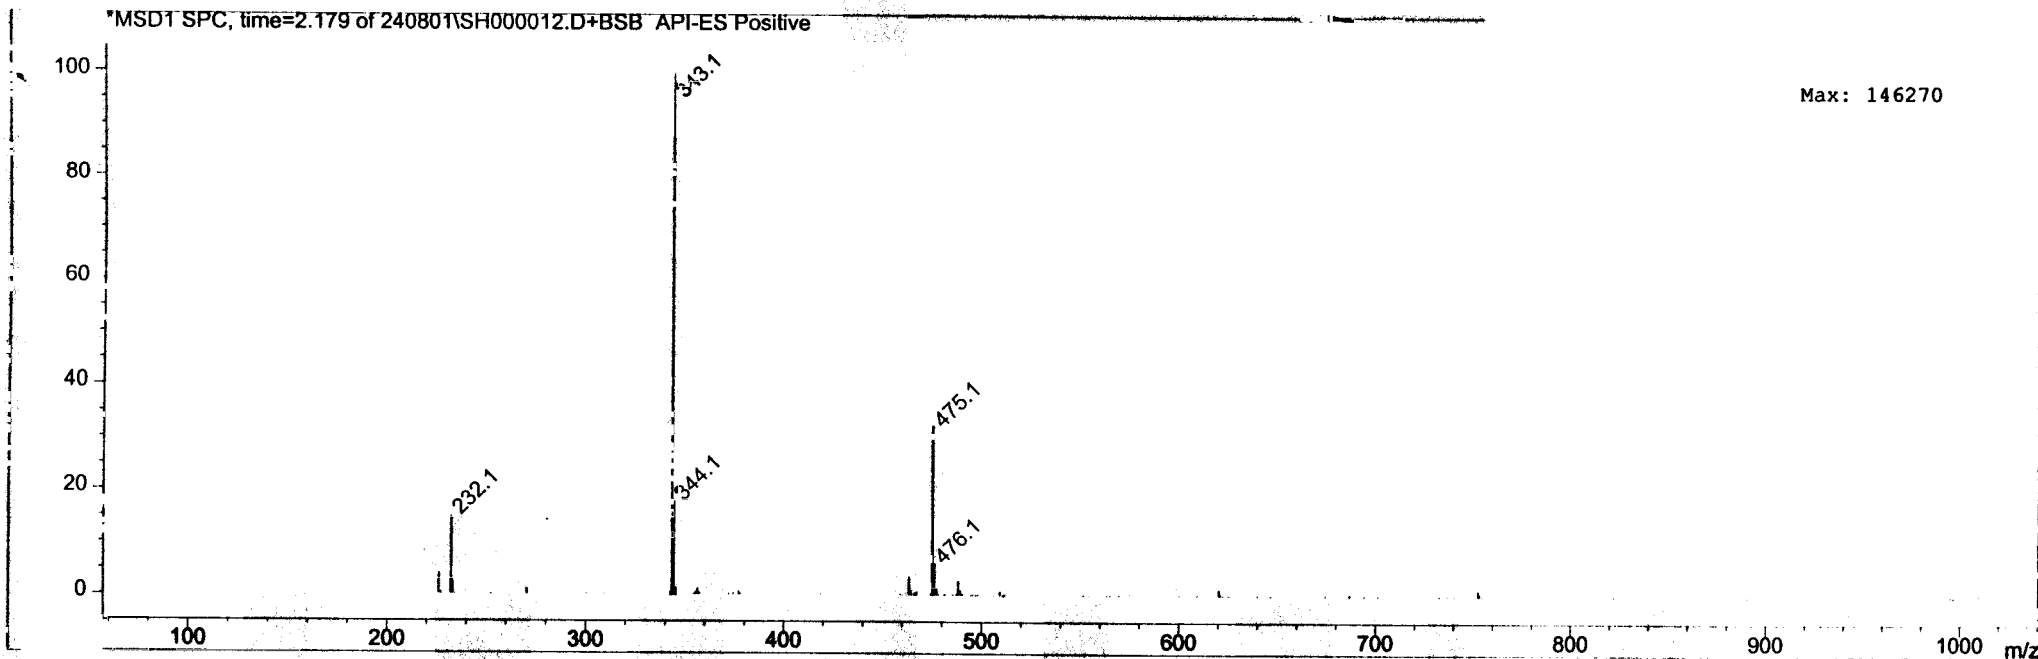

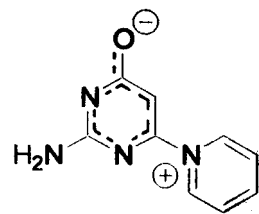

+ cytosine

12

Injection date: 8 / 24 / 01  
Fragmentor voltage: 0 V  
Solvent flow : 0.8 mL/min.  
Solvent mixture: Water / MeCN = 1 : 9  
Positive detection mode  
Drying gas temp. 140°C  
Drying gas flow: 10 L/min  
Noise Cutoff: 5000 counts  
Reportable Ion Abundance: > 10%



192.05 I  
190.05 I  
189.05 I  
134.05 I  
105.85 I

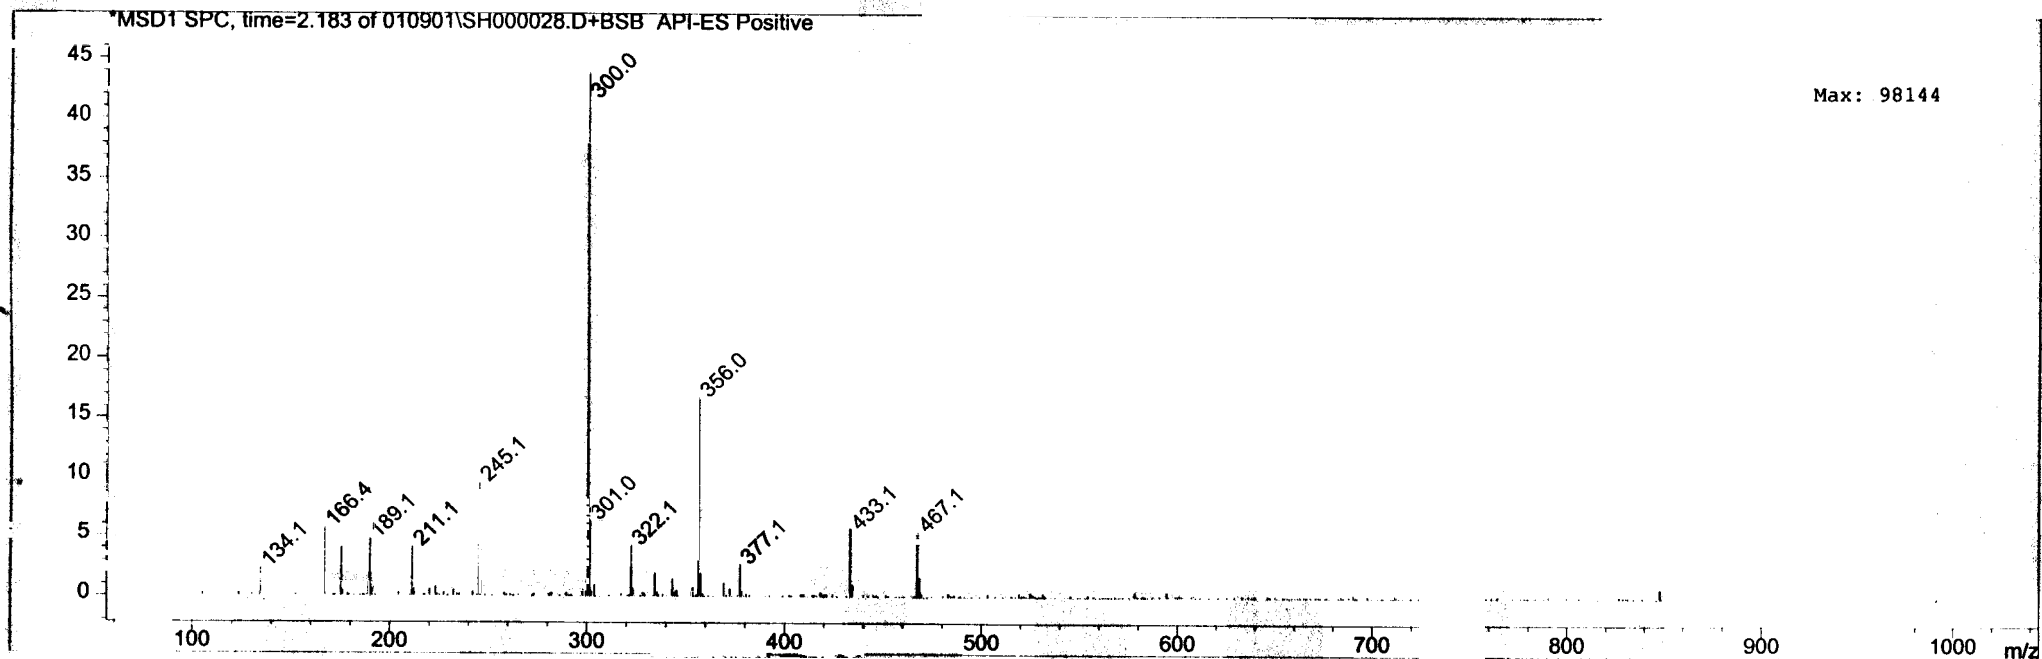

\*MSD1 SPC, time=4.825 of 010901\SH000025.D+BSB API-ES Positive

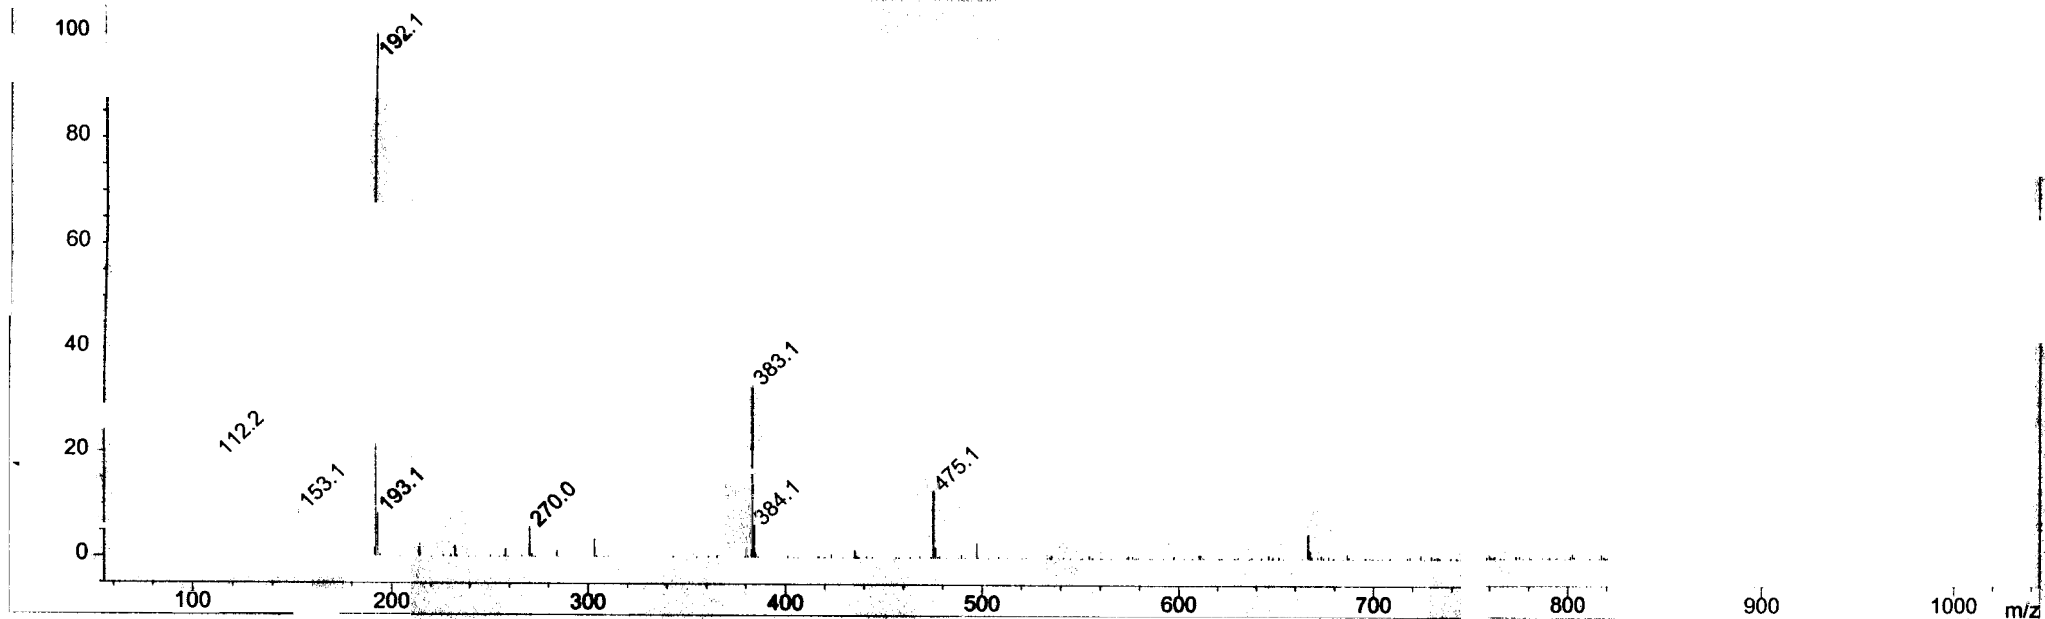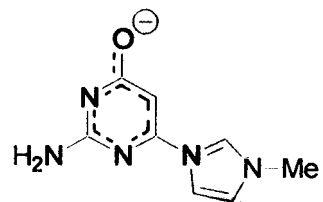

13

Injection date: 8 / 24 / 01  
Fragmentor voltage: 0 V  
Solvent flow : 0.8 mL/min.  
Solvent mixture: Water / MeCN = 1 : 9  
Positive detection mode  
Drying gas temp. 140°C  
Drying gas flow: 10 L/min  
Noise Cutoff: 5000 counts  
Reportable Ion Abundance: > 10%

| Retention Time (MS) | MS Area  | Mol. Weight or Ion |
|---------------------|----------|--------------------|
| 2.724               | 4357882  | 383.15 I           |
|                     |          | 304.05 I           |
|                     |          | 303.15 I           |
|                     |          | 193.05 I           |
|                     |          | 192.05 I           |
|                     |          |                    |
| 2.818               | 15424062 | 383.15 I           |
|                     |          | 304.05 I           |
|                     |          | 303.15 I           |
|                     |          | 192.05 I           |
|                     |          | 153.15 I           |
|                     |          | 112.05 I           |
|                     |          | 105.05 I           |
|                     |          |                    |

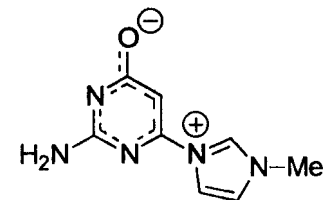

+ cytosine

13

Injection date: 8 / 24 / 01  
 Fragmentor voltage: 0 V  
 Solvent flow : 0.8 mL/min.  
 Solvent mixture: Water / MeCN = 1 : 9  
 Positive detection mode  
 Drying gas temp. 140°C  
 Drying gas flow: 10 L/min  
 Noise Cutoff: 5000 counts  
 Reportable Ion Abundance: > 10%

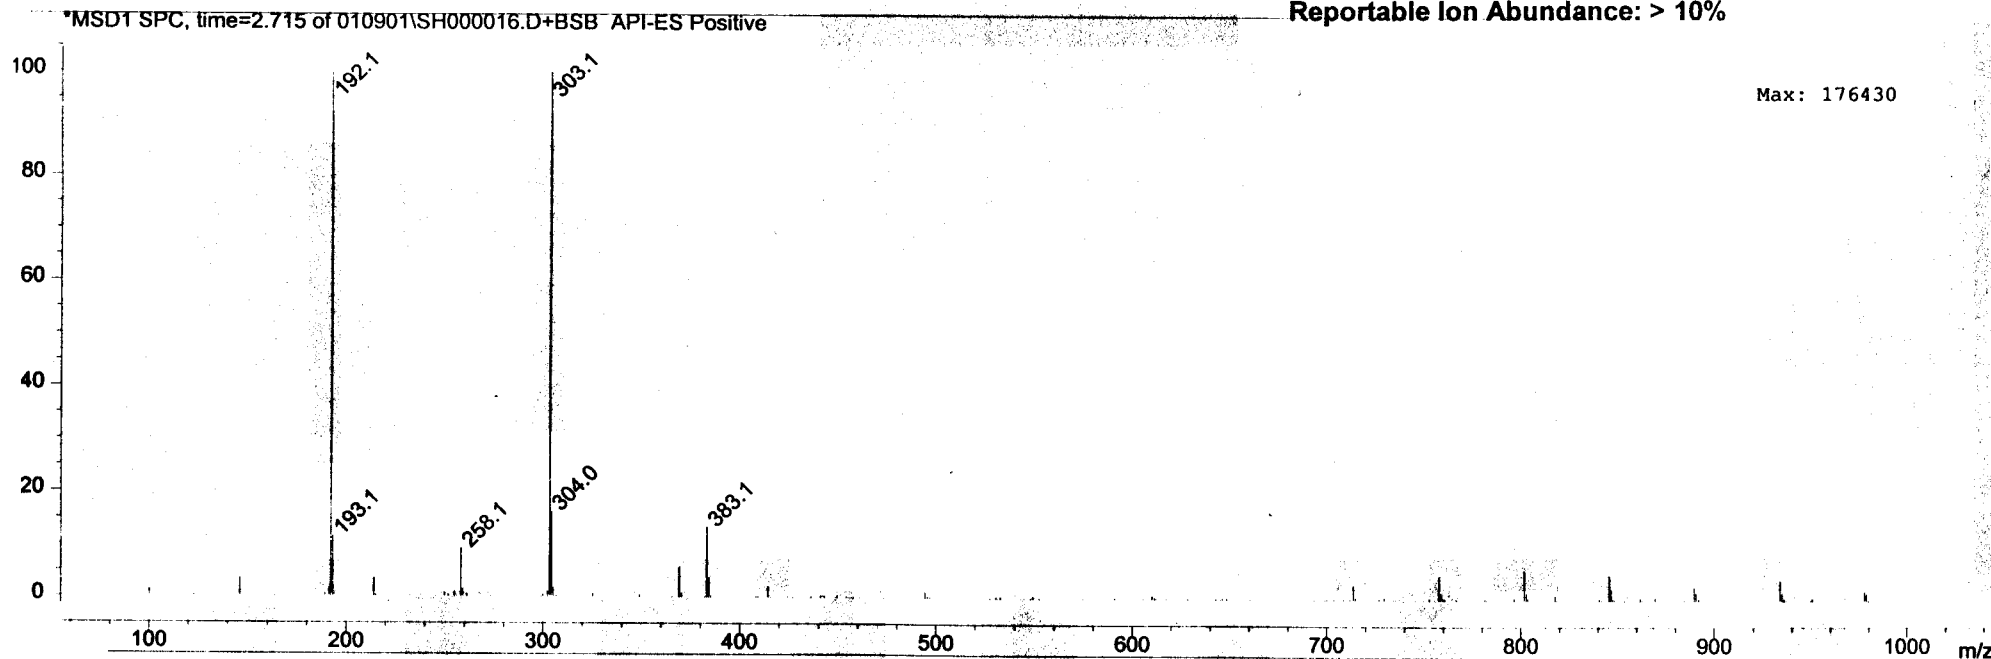

| Retention Time (MS) | MS Area | Mol. Weight or Ion |
|---------------------|---------|--------------------|
| 2.177               | 4942993 | 501.15 I           |
|                     |         | 436.15 I           |
|                     |         | 435.15 I           |
|                     |         | 370.15 I           |
|                     |         | 369.15 I           |
|                     |         | 343.15 I           |
|                     |         | 304.05 I           |
|                     |         | 303.15 I           |
|                     |         | 270.25 I           |
|                     |         | 258.05 I           |
| 192.05 I            |         |                    |
| 4.730               | 4017986 | 757.45 I           |
|                     |         | 502.25 I           |
|                     |         | 501.25 I           |
|                     |         | 435.15 I           |
|                     |         | 258.15 I           |
|                     |         | 258.15 I           |

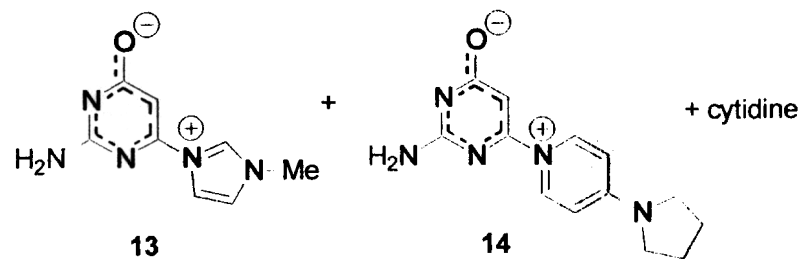

Injection date: 8 / 24 / 01  
 Fragmentor voltage: 0 V  
 Solvent flow : 0.8 mL/min.  
 Solvent mixture: Water / MeCN = 1 : 9  
 Positive detection mode  
 Drying gas temp. 140°C  
 Drying gas flow: 10 L/min  
 Noise Cutoff: 5000 counts  
 Reportable Ion Abundance: > 10%

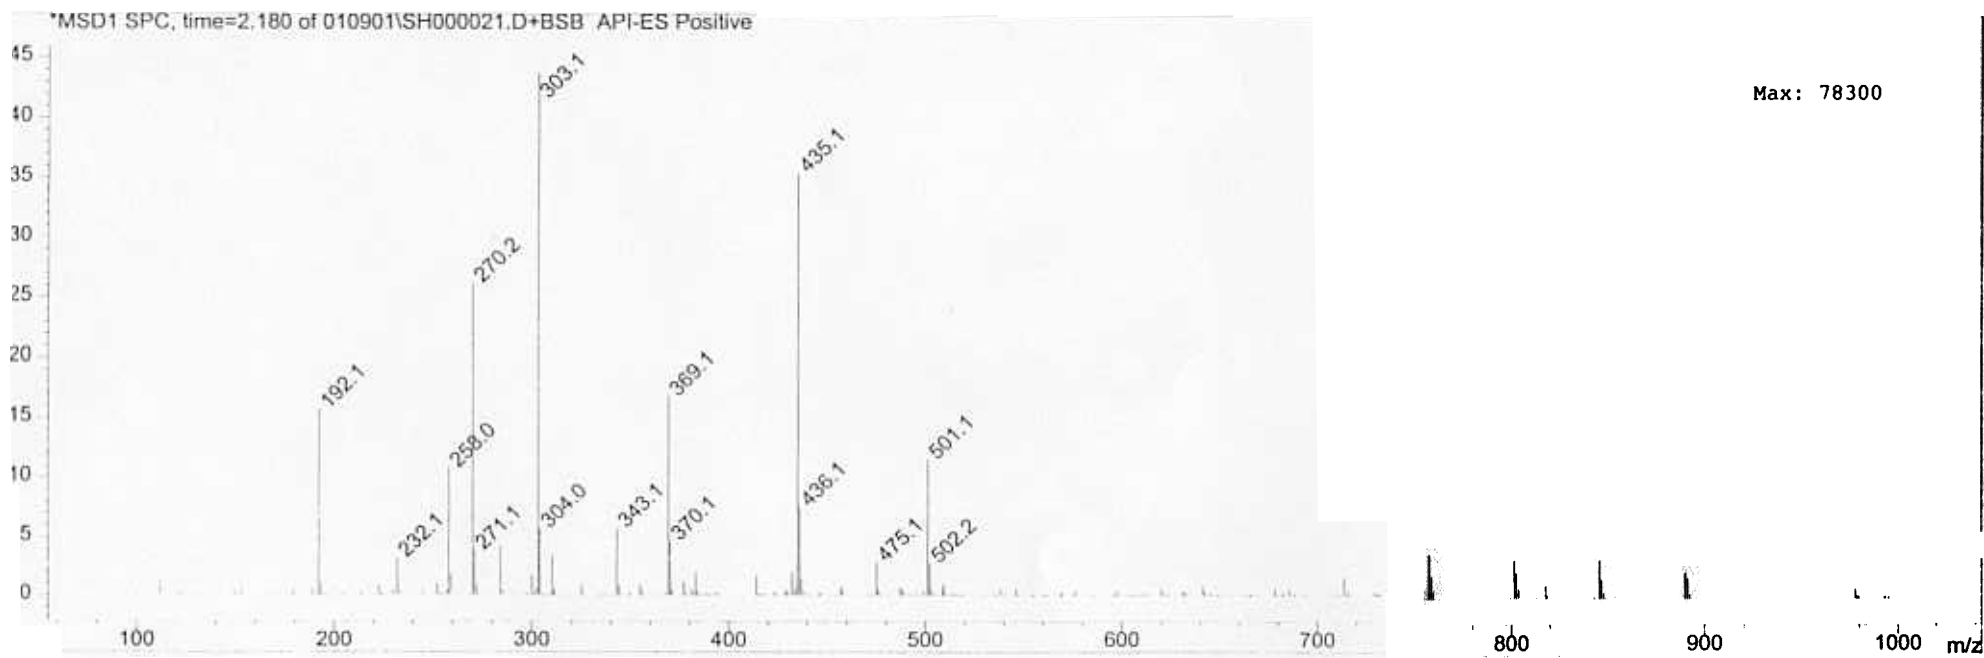

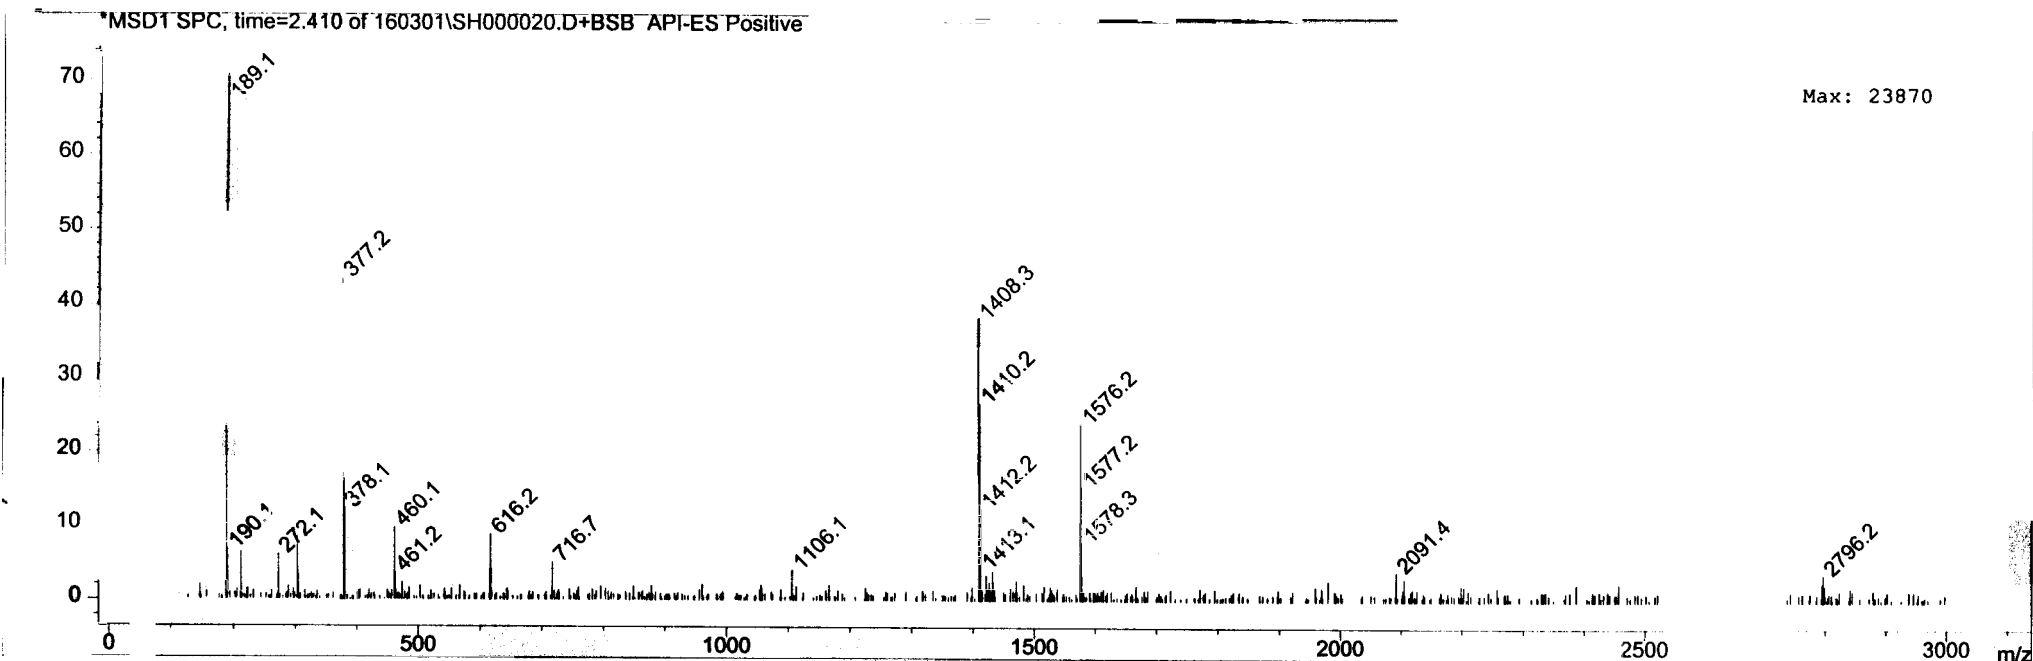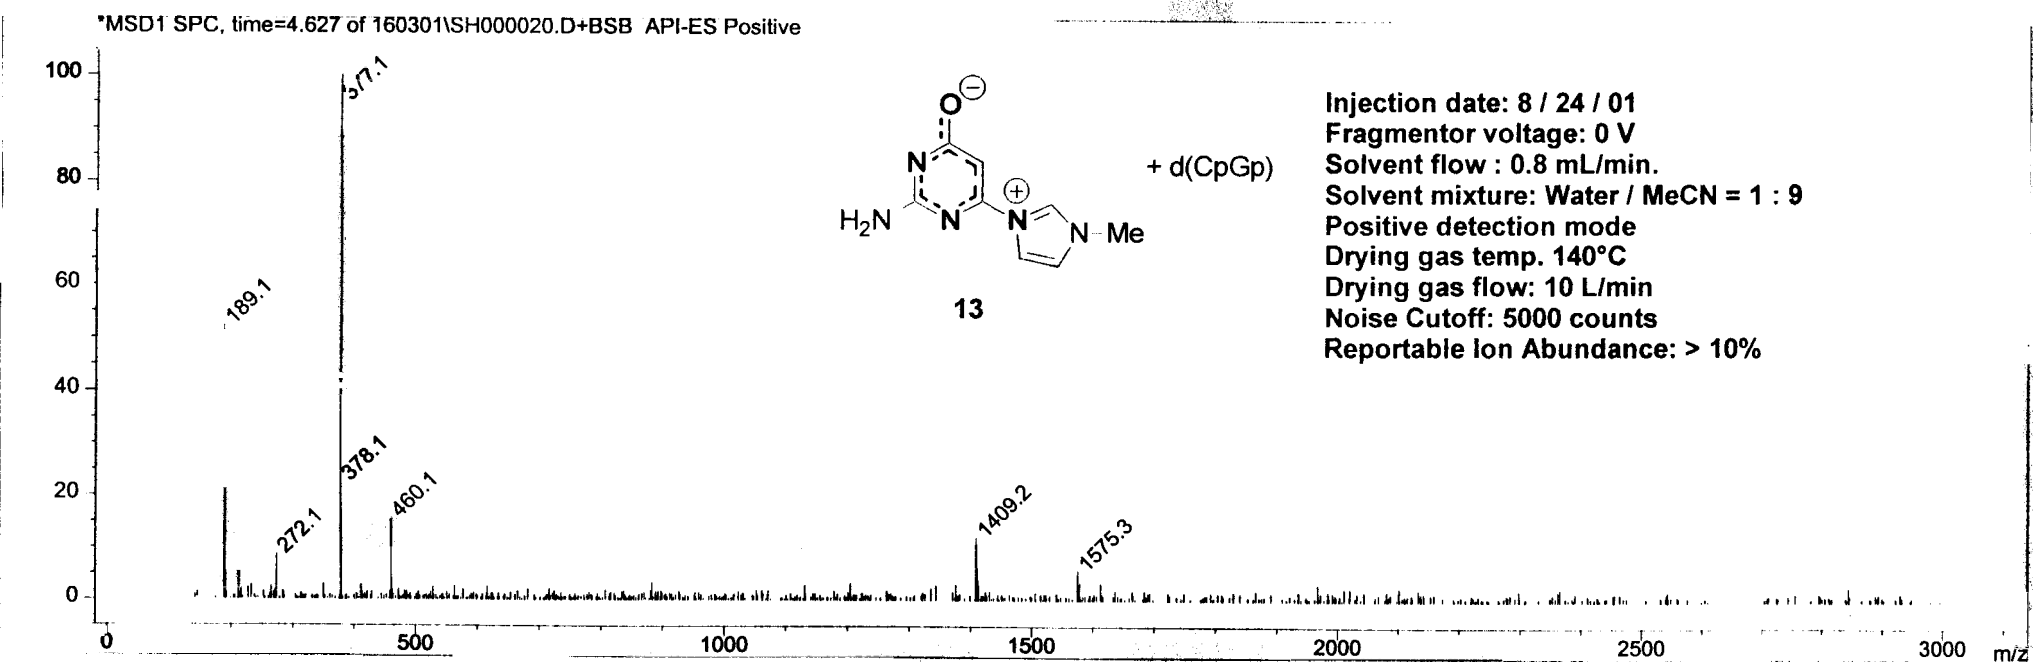

Supplement: b110318k.pdf [file b110318k.pdf]
